# Supplementary material
Source: HighWire-hosted journal article supplement (http://hw-f5-jim.highwire.org/highwire/filestream/139185/field_highwire_adjunct_files/0/AFMR_Call_for_Abstracts_2021_69_6.pdf)

**American Federation for Medical Research  
and  
Participating Societies**

**Regional Meetings  
Call for Abstracts**

**Research Travel Award Opportunities Available**

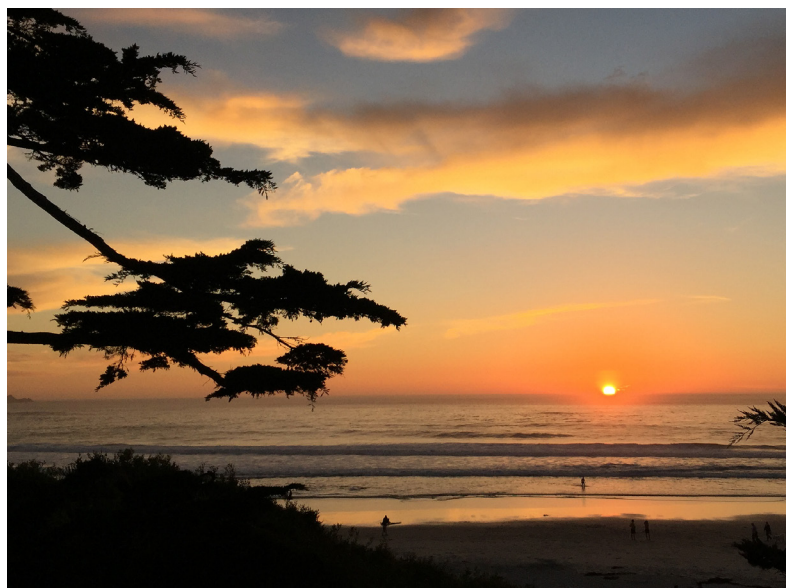

**Western  
Medical Research  
Conference**

**January 20-22, 2022**

**Abstract Deadline:  
September 24, 2021  
11:59 pm PST**

*Application for CME credit has been filed with the American Academy of Family Physicians. Determination of credit is pending.*

**Southern Regional  
Meetings**

**February 10-12, 2022**

**Abstract Deadline:  
October 8, 2021  
11:59 pm EST**

*Jointly provided by Tulane University Health Sciences Center*

*This activity has been approved for AMA PRA  
Category 1 Credits™*

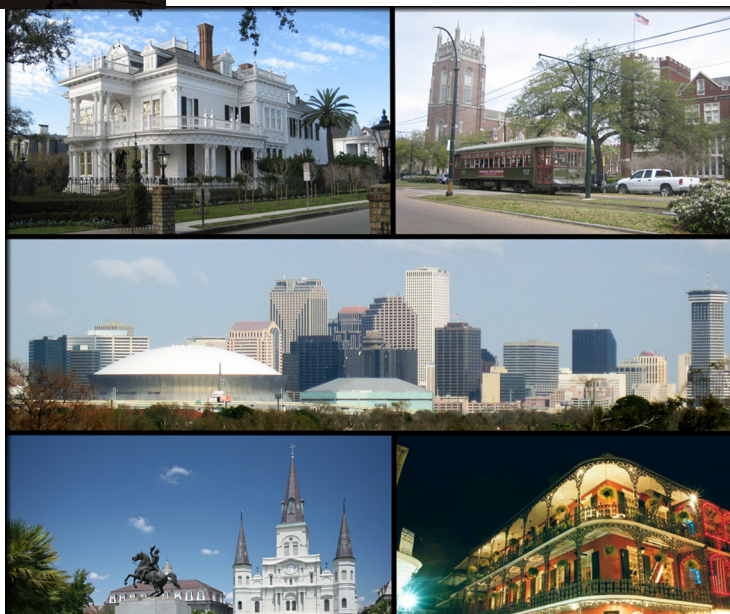

Supplement: AFMR_Call_for_Abstracts_2021_69_6.pdf [file AFMR_Call_for_Abstracts_2021_69_6.pdf]
